# Supplementary material for: Interfacial organic synthesis in a simple droplet-based microfluidic system
Source: Royal Society of Chemistry journal article supplement (doi:10.1039/c2lc40052a), 2012-01-01

## Interfacial Organic Synthesis in a Simple Droplet-Based Microfluidic System

Ji Ji, Yiqing Zhao, Liping Guo, Baohong Liu, Chang Ji and Pengyuan Yang\*

### Supporting Information

**Figure S1** The picture of the microdevice (left) with its schematic draw in AutoCAD (right).

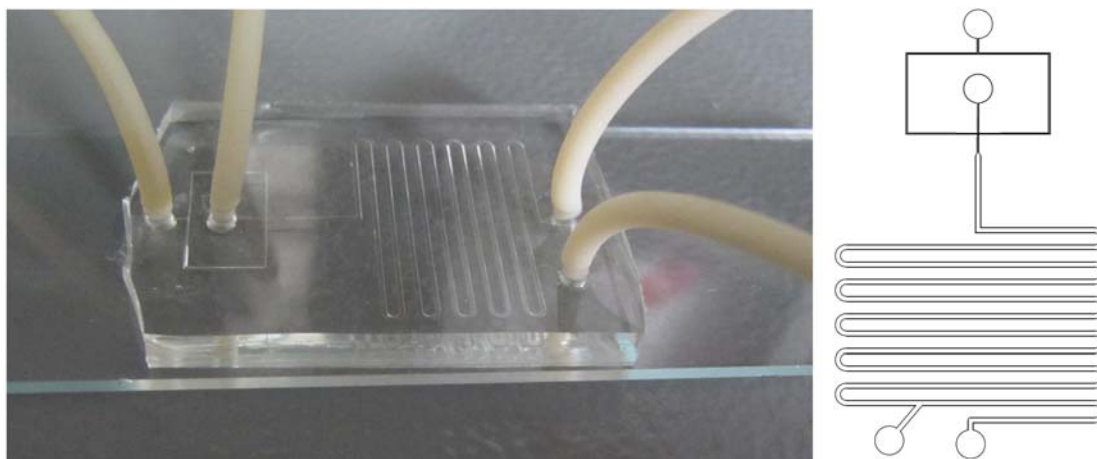

**Figure S2** Plot for the dependence of benzyl phenyl ether conversion on the reaction time in bulk reaction. Reaction condition: a 5.0 mL of aqueous solution containing 50.0 mmol of NaOH, 37.5 mmol of phenol or p-cresol, and (a) 0.75 mmol of TBABr (b) no TBABr was added to 25 mmol of benzyl halide with vigorous stirring. A fixed quantity of the reaction mixture was extracted from the bulk system. The remaining procedures are the same as the reported in experimental section.

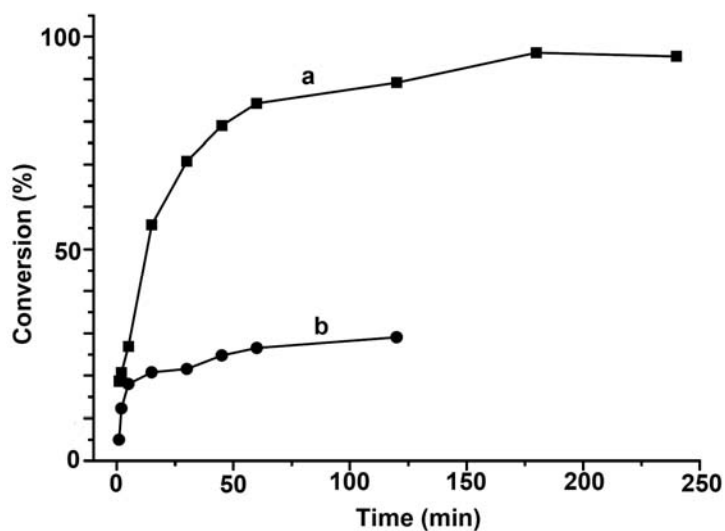

Supplement: c2lc40052a.pdf [file c2lc40052a.pdf]
